# Supplementary material
Source: PubMed Central journal article supplement (PMC3371262)
Supplement: Supp_Data.pdf [file Supp_Data.pdf]

## Supplementary Material

SUPPLEMENTARY TABLE S1. AVERAGE INTRON SIZES  
IN TEN LARGEST SCAFFOLDS OF COMMON CARP  
ASSEMBLY COMPARED TO CORRESPONDING SYntenic  
REGIONS IN ZEBRAFISH ZV9

| <i>Scaffold<br/>Carp</i> | <i>Carp<br/>Average (bp)</i> | <i>Zv9<br/>Average (bp)</i> | <i>Ratio<br/>Zebrafish/Carp</i> |
|--------------------------|------------------------------|-----------------------------|---------------------------------|
| 1.1                      | 1052                         | 1480                        | 1.41                            |
| 2.1                      | 1436                         | 2230                        | 1.55                            |
| 3.1                      | 1359                         | 2200                        | 1.62                            |
| 4.1                      | 1315                         | 2101                        | 1.60                            |
| 5.1                      | 875                          | 1773                        | 2.03                            |
| 6.1                      | 1190                         | 5668                        | 4.76                            |
| 7.1                      | 2657                         | 2960                        | 1.11                            |
| 8.1                      | 1112                         | 3068                        | 2.76                            |
| 9.1                      | 2553                         | 3551                        | 1.39                            |
| 10.1                     | 897                          | 2764                        | 3.08                            |

The average ratio is 2.13 over all scaffolds.

SUPPLEMENTARY TABLE S2. ZEBRAFISH GENES WITH ENSEMBL ANNOTATION FOR WHICH NO HOMOLOG  
CAN BE IDENTIFIED IN THE CARP GENOME

| <i>ENSEMBL Gene ID</i> | <i>EntrezGene ID</i> | <i>Unigene ID</i> | <i>Annotation</i>                                       |
|------------------------|----------------------|-------------------|---------------------------------------------------------|
| ENSDARG00000058570     | 30268                | Dr.76247          | ccl1                                                    |
| ENSDARG00000075045     | 795785               |                   | cxcl-C1c                                                |
| ENSDARG00000034222     | 553223               | Dr.90211          | HCLS1-binding protein 3 (LOC553223)                     |
| ENSDARG00000093249     | 561329               |                   | latrophilin 2 (sugar binding)                           |
| ENSDARG00000055679     | 100009640            | Dr.80962          | MTO1 (mitochondrial translation optimization 1 homolog) |
| ENSDARG00000058917     | 321023               |                   | nanor (nnr transcriptional regulator)                   |
| ENSDARG00000009890     |                      | Dr.75128          | retrovirus ZFERV envelope protein (env)                 |
| ENSDARG00000088713     | 795554               | Dr.75545          | similar to bromodomain containing 7                     |
| ENSDARG00000068869     | 558896               | Dr.114764         | similar to Hspa12a                                      |
| ENSDARG00000041433     | 562950               |                   | TPRXL (tetra-peptide repeat homeobox-like)              |
| ENSDARG00000038271     |                      | Dr.84795          | zgc:113293 (in situ: not spatially restricted)          |

SUPPLEMENTARY TABLE S3. DESCRIPTION OF BEST SIGNIFICANT HITS (E-VALUE SMALLER THAN 0.01) RESULTING FROM TBLASTX ANALYSIS OF 47 CARP GENE PREDICTIONS FOR WHICH NO HOMOLOG CAN BE IDENTIFIED IN ZEBRAFISH ZV9 GENOME ASSEMBLY

| Carp prediction query (bp) | Length (bp) | Best TBLASTX identifier | Best TBLASTX Length Target (bp) | Best tblastx hit species                            | BTH Query coverage | BTH E value | BTH score | General annotation from blast or do-main search                                             | Notes from blast search                                                 |
|----------------------------|-------------|-------------------------|---------------------------------|-----------------------------------------------------|--------------------|-------------|-----------|---------------------------------------------------------------------------------------------|-------------------------------------------------------------------------|
| g58512                     | 1179        | XM_003454817            | 3047                            | <i>Oreochromis niloticus</i> (Nile tilapia)         | 44%                | 3e-39       | 61.9      | rho guanine nucleotide exchange factor 26-like                                              | Many rhogef hits, no ZF                                                 |
| g57951                     | 1107        | CP001102                | Complete genome                 | <i>Candidatus Amoebophilus asiaticus</i> 5a2        | 43%                | 3e-26       | 73.9      | ND                                                                                          | No eukaryote hit, no other good hits                                    |
| g69595                     | 1020        | HQ021623                | 33396bp                         | <i>Sparus aurata</i> (gilthead seabream)            | 90%                | 2e-141      | 176       | Similar to chaperonin, similar to TLR                                                       | TLR hit with <i>Oncorhynchus mykiss</i> DQ872852.1, no hit ZF           |
| g51774                     | 1005        | CP001102                | Complete genome                 | <i>Candidatus Amoebophilus asiaticus</i> 5a2        | 21%                | 9e-06       | 53.3      | ND                                                                                          | No eukaryote hit, no other good hits                                    |
| g7421                      | 2871        | X60391.1                | 1111                            | <i>Phaeococcus vulgaris</i>                         | 9%                 | 0.003       | 52.8      | prolin-rich protein (PvPRP1)                                                                | Other proline rich hits also in animals, no hit ZF                      |
| g42526                     | 942         | FQ310506.2              | Chromosome                      | <i>Dicentrarchus labrax</i> (European seabass)      | 93%                | 7e-134      | 180       | Similar to variable lymphocyte receptor A, homology to homeobox                             | Many good hits with few function predictions, no hit ZF                 |
| g23091                     | 900         | XM_003447277            | 2778                            | <i>Oreochromis niloticus</i> (Nile tilapia)         | 65%                | 6e-36       | 74.8      | C7orf63 homolog                                                                             | Many homologs, no hit ZF                                                |
| g68181                     | 858         | XM_003445937.1          | 2763                            | <i>Oreochromis niloticus</i> (Nile tilapia)         | 67%                | 3e-57       | 157       | RING finger protein 17-like                                                                 | Many homologs, no hit ZF                                                |
| g52411                     | 720         | NM_001141647.1          | 2626                            | <i>Salmo salar</i>                                  | 58%                | 2e-44       | 187       | Male-specific lethal 3-like 1                                                               | Many similar homologs, no hit ZF                                        |
| g8791                      | 687         | XM_223231.5             | 3448                            | <i>Rattus norvegicus</i>                            | 13%                | 6e-07       | 62.5      | coiled-coil domain containing 158 (Cccl58)                                                  | Other coiled coil hits, no hit ZF                                       |
| g13403                     | 582         | XM_003457514            | 2967                            | <i>Oreochromis niloticus</i> (Nile tilapia)         | 46%                | 3e-40       | 172       | reversion-inducing-cysteine-richprotein with kazal motifs (RECK)                            | Many other hits with same predicted function, no hits ZF                |
| g71092                     | 1310        | CP001102.1              | Complete genome                 | <i>Candidatus Amoebophilus asiaticus</i> 5a2        | 23%                | 8e-15       | 65.0      | ND                                                                                          | No other hits lower than 0.25 (pongo)                                   |
| g69330                     | 830         | XM_001620354            | 975                             | <i>Nematostella vectensis</i> (starlet sea anemone) | 45%                | 3e-35       | 137       | Transmembrane, nonfunctional variable lymphocyte receptor (Eptatretus)                      | Many other homologs, indications for GPCR olfactory receptor, no hit ZF |
| g46173                     | 738         | XM_001624001            | 2832                            | <i>Nematostella vectensis</i> (starlet sea anemone) | 69%                | 5e-53       | 197       | Many homologs from a diversity of species, none with a predicted function                   | No hits ZF                                                              |
| g53183                     | 648         | XM_002612756.1          | 2054                            | <i>Branchiostoma floridae</i>                       | 93%                | 7e-40       | 100       | Many homologs from a diversity of species, all hypothetical                                 | No hits ZF                                                              |
| g69331                     | 1566        | XM_001624001.1          | 2832                            | <i>Nematostella vectensis</i> (starlet sea anemone) | 63%                | 7e-87       | 143       | nonfunctional variable lymphocyte receptor A (VLRA)                                         | Many other homologs, No hits ZF                                         |
| g36022                     | 1128        | FQ212344.1              | 3022                            | <i>Rattus norvegicus</i>                            | 12%                | 3e-5        | 57.9      | APAIP-PTG-SIPD here described novel motive found in many mammals and chicken, C14orf37-like | No hits ZF                                                              |

Manual annotation is based on evaluation of all blast hits and protein domain predictions. Abbreviations: ND, not determined; ZF, zebrafish.

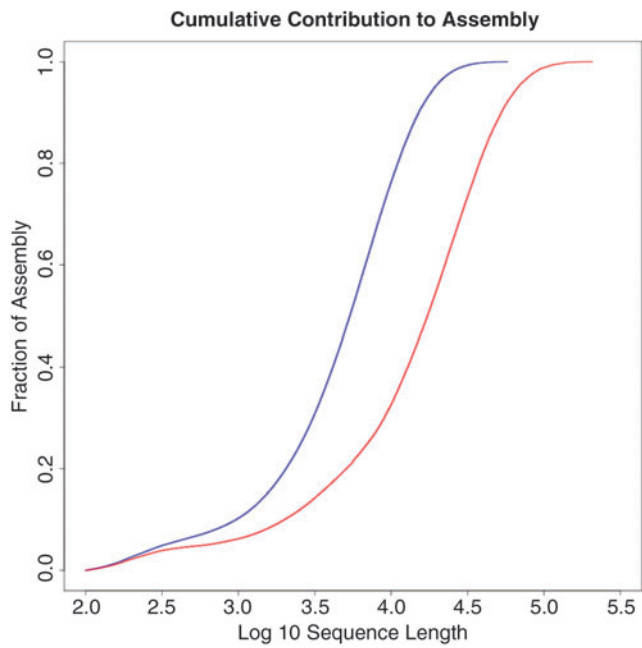

**SUPPLEMENTARY FIG. S1.** Contig/scaffold size distribution of the common carp genome assembly. The cumulative contribution (*y-axis*) of assembled fragments of a certain size (*x-axis*) to the total assembled genome size is shown in *blue* for the initial contigs, and in *red* for the final scaffolds. The fragment size at which the cumulative fraction is 0.5 represents the N50 of the assembly.

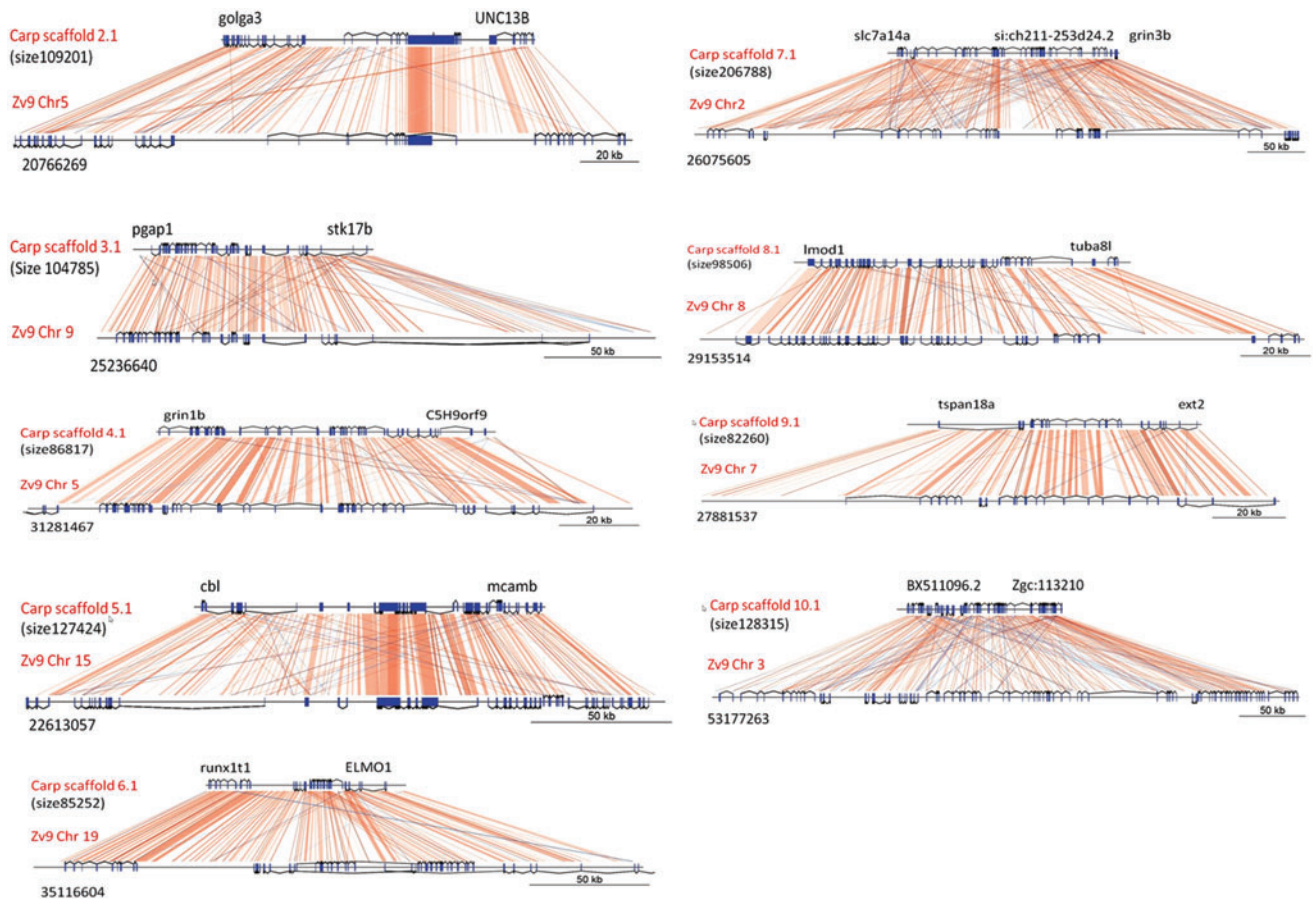

**SUPPLEMENTARY FIG. S2.** Synteny of 9 other largest carp scaffolds with the zebrafish Zv9 orthologs. The number indicated in the *right bottom of the panels* is the nucleotide start position in the Zv9 ENSEMBL database. The names of the genes indicated at the *borders of the scaffolds* are taken from the Zv9 ENSDARG annotations. The indicated gene structures were predicted with the program Augustus.

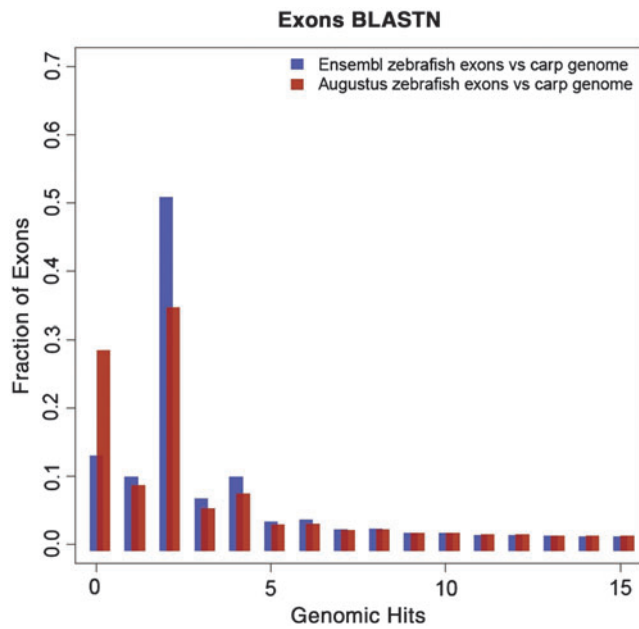

**SUPPLEMENTARY FIG. S3.** Analysis of multiplicity of blast hits. Results obtained using zebrafish exons predicted by Augustus instead of annotated by ENSEMBL as shown in Figure 5. ENSEMBL annotations in *blue*, Augustus prediction in *red*. Both show on average two best hits on the carp genome.

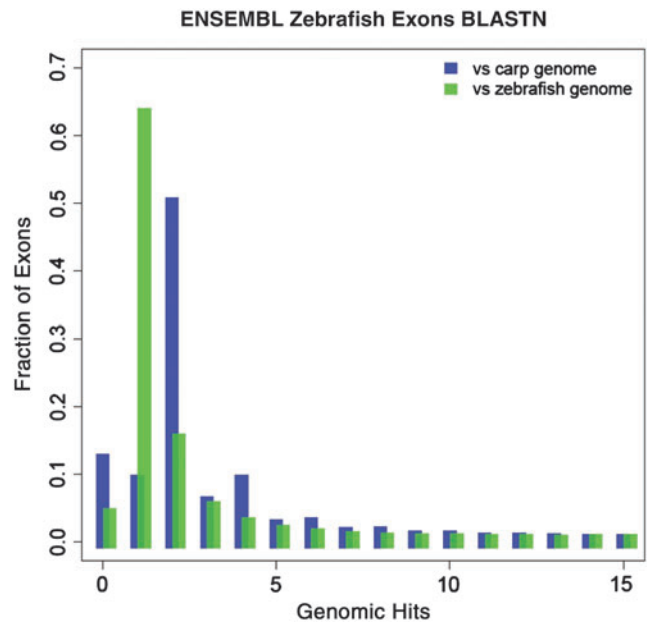

**SUPPLEMENTARY FIG. S4.** Analysis of multiplicity of blast hits. Supplement to Figure 5. As control, a BLASTN of zebrafish exons *versus* the zebrafish genome was performed (*green bars*) showing on average a single hit.
